# Supplementary material for: Silencing of VEGFR2 by RGD-Modified Lipid Nanoparticles Enhanced the Efficacy of Anti-PD-1 Antibody by Accelerating Vascular Normalization and Infiltration of T Cells in Tumors
Source: Cancers (Basel). 2020 Dec 4;12(12):3630. doi: 10.3390/cancers12123630 (PMC7761875; doi:10.3390/cancers12123630)
Supplement: Supplementary file 1 [file cancers-12-03630-s001.xlsx]

## Sheet: Sheet1
Table S1. List of antibodies used in the study
Porpuse	Antibody	Conjugate	Isotype	Clone	Concentration /Dilution	Campany
Treatment	anti-mouse PD-1	―	rat IgG2a	RMP1–14	2mg/mL	BioXcell
Treatment	IgG2a isotype control	―	rat IgG2a	2A3	2mg/mL	BioXcell
Flow	anti-mouse CD45	Brilliant Violet 605	rat IgG2b	30-F11	×100	BioLegend
Flow	anti-mouse CD3	APC	rat IgG2a	17A2	×100	BioLegend
Flow	anti-mouse CD8	PE	rat IgG2a	53–6.7	×100	BioLegend
Flow	anti-mouse PD-1	Brilliant Violet 510	rat IgG2a	29F.1A12	×100	BioLegend
Flow	anti-mouse Tim-3	PE-Cy7	rat IgG2a	RMT3-23	×100	BioLegend
Flow	ant-human Integrin avb3	PE	mouse IgG1	23C6	×100	R&D systems
IF	anti-mouse CD31	―	Hamster IgG	2H8	×100	ThermoFisher
IF	anti-mouse VEGFR2	―	rat IgG2a	89B3A5	×100	BioLegend
IF	anti-mouse aSMA	Cy-3	mouse IgG2a	1A4	×100	SIGMA
